# Supplementary material for: Determination of drought tolerance of different strawberry genotypes
Source: PeerJ journal article supplement (doi:10.7717/peerj.14972), 2023-02-28
Supplement: abbreviations_list.pdf [file abbreviations_list.pdf]

## Abbreviations

CWSI: Crop water stress index

Dap: Day after planting

E: Transpiration rate

Eo: Cumulative free surface water evaporation from Class A pan at irrigation interval

Epan: Pan's evaporation

FAO: The Food and Agriculture Organization of the United Nations

gs: Stomatal conductance

IR: Irrigation

IRT: Infrared thermometer

IWUE: Irrigation water use efficiency

Kcp: Crop-pan coefficients

LL: Non-water-stressed baseline

P: Wetted area

Par: Photosynthetic available radiation

Pn: Net photosynthesis

Ta = Air temperature

Tc: Canopy temperature

UL: Non-transpiring upper baseline

VPD: Vapor pressure deficit

WS: Water stress

WW: Well-watered
