# Supplementary material for: Determination of drought tolerance of different strawberry genotypes
Source: PeerJ journal article supplement (doi:10.7717/peerj.14972), 2023-02-28
Supplement: supplementary_for_cwsi-dap-plot.pdf [file supplementary_for_cwsi-dap-plot.pdf]

```
In [1]: from bokeh.plotting import figure, show
from bokeh.io import output_notebook
import bokeh
from bokeh.models import SingleIntervalTicker, LinearAxis
from bokeh.models import ColumnDataSource, Range1d, LabelSet, Label

from bokeh.resources import INLINE
import bokeh.io
bokeh.io.output_notebook(INLINE)
from sklearn.linear_model import LinearRegression, LogisticRegression
```

Loading BokehJS ...

```
In [8]: import pandas as pd
df_in=pd.read_excel('cws_i_graphs.xlsx')
df_in
```

```
Out[8]:
```

|   | dap (day<br>after<br>planting) | Rubygem_WW | Rubygem_WS | Festival_WW | Festival_WS | 33_WW    | 33_WS    |
|---|--------------------------------|------------|------------|-------------|-------------|----------|----------|
| 0 | 187                            | 0.453410   | 0.512142   | 0.463439    | 0.568373    | 0.433272 | 0.536314 |
| 1 | 200                            | 0.466236   | 0.562847   | 0.483620    | 0.606649    | 0.458194 | 0.563546 |
| 2 | 214                            | 0.494854   | 0.602851   | 0.503632    | 0.626767    | 0.492502 | 0.610687 |
| 3 | 228                            | 0.502097   | 0.655298   | 0.511455    | 0.625715    | 0.502574 | 0.618856 |
| 4 | 242                            | 0.514993   | 0.681962   | 0.528596    | 0.648729    | 0.523381 | 0.668177 |
| 5 | 256                            | 0.508686   | 0.699196   | 0.547685    | 0.705053    | 0.522456 | 0.687126 |
| 6 | 271                            | 0.521590   | 0.713184   | 0.562728    | 0.735635    | 0.531753 | 0.738184 |

```
In [47]: import re
s=figure(width=1000,height=300,x_axis_type=None)
keys=[a for a in df_in.keys() if '_' in a]
markers=['square','square','circle','circle','triangle','triangle','diamond']
for key,count,marker in zip(keys,range(len(keys)),markers):
    if re.search('WS',key):
        if count<3:
            s.line(df_in['dap (day after planting)'].values,df_in[key],color=
        else:
            s.line(df_in['dap (day after planting)'].values,df_in[key],color=
            s.scatter(df_in['dap (day after planting)'].values,df_in[key],color=
    else:
        if count<3:
            s.line(df_in['dap (day after planting)'].values,df_in[key],color=
        else:
            s.line(df_in['dap (day after planting)'].values,df_in[key],color=
            s.scatter(df_in['dap (day after planting)'].values,df_in[key],color=

ticker = SingleIntervalTicker(interval=10, num_minor_ticks=5)
xaxis = LinearAxis(ticker=ticker)
s.add_layout(xaxis, 'below')
s.add_layout(s.legend[0], 'right')
s.xaxis.axis_label='Day After Planting (DAP)'
s.yaxis.axis_label='CWSI'
s.xaxis.axis_label_text_font_size = "15pt"
s.yaxis.axis_label_text_font_size = "15pt"
s.axis.axis_label_text_font_style = 'bold'
```

```
s.legend.label_text_font_size = "15pt"  
s.yaxis.major_label_text_font_size = "15pt"  
s.xaxis.major_label_text_font_size = "15pt"  
  
show(s)
```
